# Supplementary material for: Complete chloroplast genome of the genus Cymbidium: lights into the species identification, phylogenetic implications and population genetic analyses
Source: PubMed Central journal article supplement (PMC3644226; doi:10.1186/1471-2148-13-84), 2013-04-18

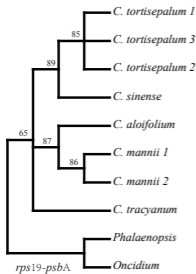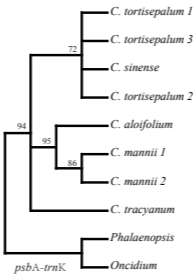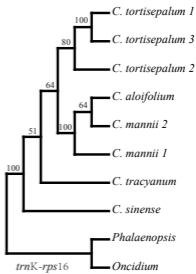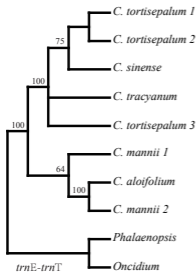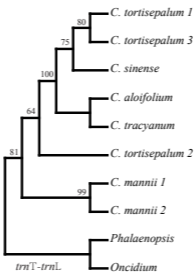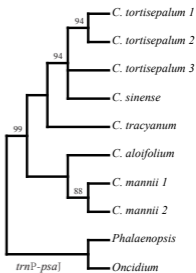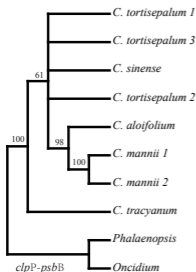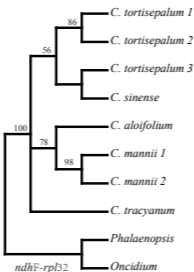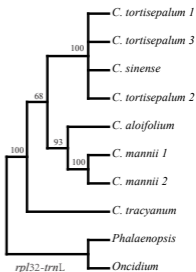

Supplement: 1471-2148-13-84-S3.pdf [file 1471-2148-13-84-S3.pdf]
